# Supplementary material for: Preparation and In Vitro and In Vivo Evaluation of Rectal In Situ Gel of Meloxicam Hydroxypropyl-β-cyclodextrin Inclusion Complex
Source: MDPI journal article supplement (doi:10.3390/molecules28104099), 2023-05-15
Supplement: s1 [file s1]

## Supplementary materials

### Tables

**Table S1** Factors and levels.

| Level | Factor                               |                                         |                    |                           |
|-------|--------------------------------------|-----------------------------------------|--------------------|---------------------------|
|       | adding quantity of ammonia water (A) | the ratio of MLX to HP- $\beta$ -CD (B) | inclusion time (C) | inclusion temperature (D) |
| 1     | 5                                    | 1:4                                     | 30                 | 20                        |
| 2     | 10                                   | 1:6                                     | 60                 | 30                        |
| 3     | 15                                   | 1:8                                     | 90                 | 40                        |

**Table S2** Orthogonal design results.

| Number | A     | B     | C     | D     | Inclusion Rate   |
|--------|-------|-------|-------|-------|------------------|
| 1      | 1     | 1     | 1     | 1     | 33.59 $\pm$ 0.93 |
| 2      | 1     | 2     | 2     | 2     | 71.63 $\pm$ 2.58 |
| 3      | 1     | 3     | 3     | 3     | 86.24 $\pm$ 3.32 |
| 4      | 2     | 1     | 3     | 2     | 56.39 $\pm$ 2.95 |
| 5      | 2     | 2     | 1     | 3     | 71.34 $\pm$ 0.97 |
| 6      | 2     | 3     | 2     | 1     | 79.86 $\pm$ 1.31 |
| 7      | 3     | 1     | 2     | 3     | 57.31 $\pm$ 2.49 |
| 8      | 3     | 2     | 3     | 1     | 88.85 $\pm$ 1.36 |
| 9      | 3     | 3     | 1     | 2     | 78.61 $\pm$ 0.53 |
| K1     | 63.82 | 47.00 | 61.18 | 67.43 |                  |
| K2     | 68.30 | 77.27 | 68.40 | 67.98 |                  |
| K3     | 73.72 | 81.57 | 66.26 | 70.43 |                  |
| R      | 9.90  | 34.57 | 15.08 | 3.00  |                  |

**Table S3** Analysis of variance.

| Error source | SS      | f | S       | F      | P     |
|--------------|---------|---|---------|--------|-------|
| A            | 147.57  | 2 | 73.78   | 9.65   | >0.05 |
| B            | 2130.45 | 2 | 1065.23 | 139.30 | <0.05 |
| C            | 15.29   | 2 | 7.65    |        | >0.05 |
| D            | 341.31  | 2 | 170.66  | 22.32  | >0.05 |

**Table S4** Stability investigation of MLX/HP- $\beta$ -CD-ISG.

|            |                      | 0d                   | 5d                  | 10d                 |
|------------|----------------------|----------------------|---------------------|---------------------|
| 4°C        | MLX content          | 100%                 | 97.32%              | 95.49%              |
|            | pH                   | 7.12 $\pm$ 0.05      | 6.95 $\pm$ 0.01     | 6.66 $\pm$ 0.02     |
|            | Gelation Temperature | (33.40 $\pm$ 0.17)°C | (33.10 $\pm$ 0.1)°C | (33.80 $\pm$ 0.2)°C |
| high light | MLX content          | 100%                 | 95.01%              | 83.97%              |
|            | pH                   | 7.12 $\pm$ 0.05      | 7.10 $\pm$ 0.02     | 7.07 $\pm$ 0.03     |
|            | Gelation Temperature | (33.40 $\pm$ 0.17)°C | (33.50 $\pm$ 0.2)°C | (33.20 $\pm$ 0.3)°C |

|                     |                      |                |               |               |
|---------------------|----------------------|----------------|---------------|---------------|
| high<br>humidity    | MLX content          | 100%           | 87.36%        | 74.53%        |
|                     | pH                   | 7.12±0.05      | 6.67±0.03     | 6.53±0.05     |
|                     | Gelation Temperature | (33.40±0.17)°C | (34.20±0.3)°C | (34.10±0.3)°C |
| high<br>temperature | MLX content          | 100%           | 83.91%        | 70.82%        |
|                     | pH                   | 7.12±0.05      | 6.50±0.03     | 6.32±0.03     |
|                     | Gelation Temperature | (33.40±0.17)°C | (33.10±0.3)°C | (34.50±0.2)°C |

**Table S5** The mathematical model fitting of release kinetics of MLX from different formulations.

| Model                  | MLX solution             | MLX/HP-β-CD             | MLX-ISG                 | MLX/HP-β-CD-ISG         |
|------------------------|--------------------------|-------------------------|-------------------------|-------------------------|
| Zero-order<br>kinetic  | $M_t=2.68t+52.97$        | $M_t=3.28t+27.42$       | $M_t=3.26t+22.93$       | $M_t=3.06t+19.06$       |
|                        | $R^2=0.6179$             | $R^2=0.8040$            | $R^2=0.8426$            | $R^2=0.8588$            |
| First-order<br>kinetic | $\ln M_t=0.76t+92.57$    | $\ln M_t=0.24t+84.51$   | $\ln M_t=0.20t+82.16$   | $\ln M_t=0.18t+76.17$   |
|                        | $R^2=0.8298$             | $R^2=0.9496$            | $R^2=0.9645$            | $R^2=0.9753$            |
| Higuchi<br>kinetic     | $M_t=16.10t^{1/2}+35.96$ | $M_t=18.28t^{1/2}+9.71$ | $M_t=18.08t^{1/2}+5.58$ | $M_t=16.87t^{1/2}+3.02$ |
|                        | $R^2=0.8333$             | $R^2=0.9628$            | $R^2=0.9709$            | $R^2=0.9767$            |

## Figures

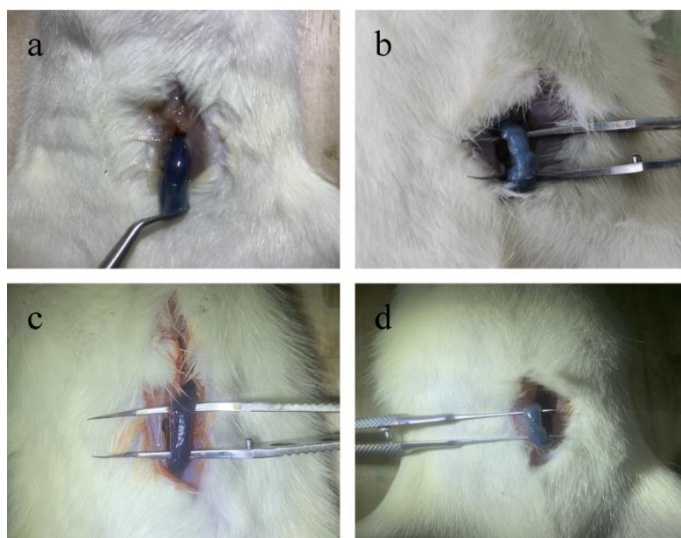

**Figure S1** In vivo localization of MLX/HP-β-CD-ISG in the rectum at (a) 30min; (b) 3h; (c) 6h; and (d) 12h after rectal administration.

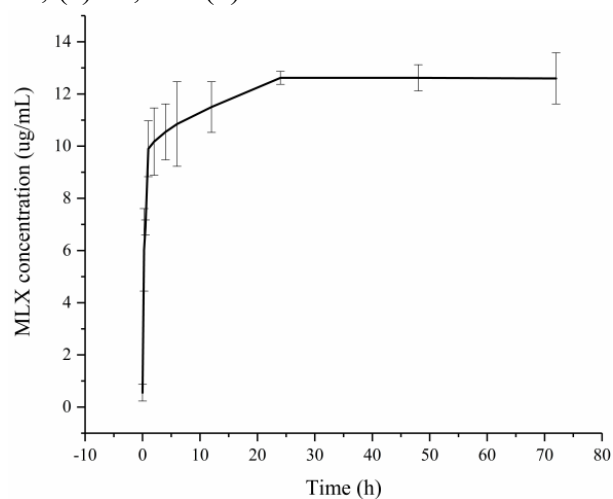

**Figure S2** The equilibration time of MLX Solubility.

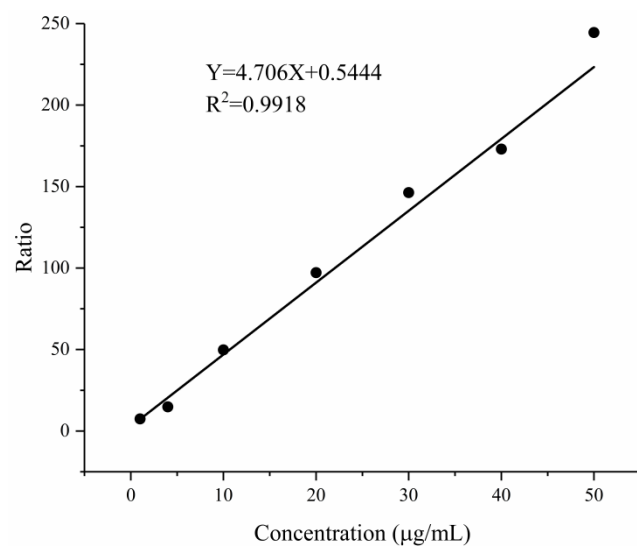

**Figure S3** Standard curve and linear range.
